# Supplementary material for: Synergistic tailoring of doping and vacancies in tungsten carbide for efficient hydrogen evolution
Source: Royal Society of Chemistry journal article supplement (doi:10.1039/d3se00639e), 2023-01-01
Supplement: d3se00639e1.pdf [file d3se00639e1.pdf]

## Supplementary Information

### **Synergistic tailoring of doping and vacancy in tungsten carbide for efficient hydrogen evolution**

*Chenfan Yang*<sup>\*a</sup>, *Guoling Mao*<sup>a</sup>, *Chuangen Zhu*<sup>a</sup>, *Ning Ding*<sup>a</sup>, *Bowen Pu*<sup>a</sup>, *Lei Zhong*<sup>a</sup>,  
*and Bo Wu*<sup>a</sup>

<sup>a</sup> China North Engine Research Institute (Tianjin), Tianjin 300400, China.

\*Corresponding authors.

*E-mail addresses:* chenfany1018@163.com (C. Yang)

## Supporting Figures

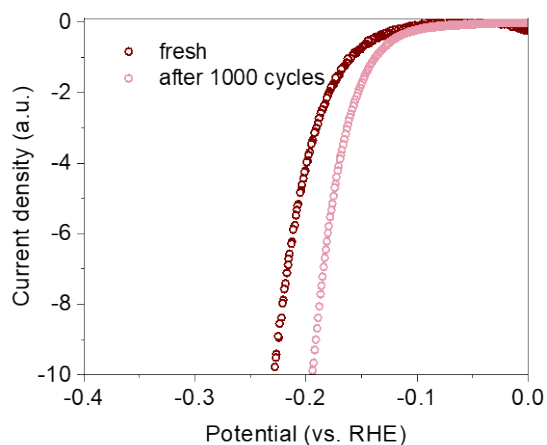

**Fig. S1** The LSVs of the  $V_C$ -Zn-WC catalyst in the fresh and 1000th cycles.

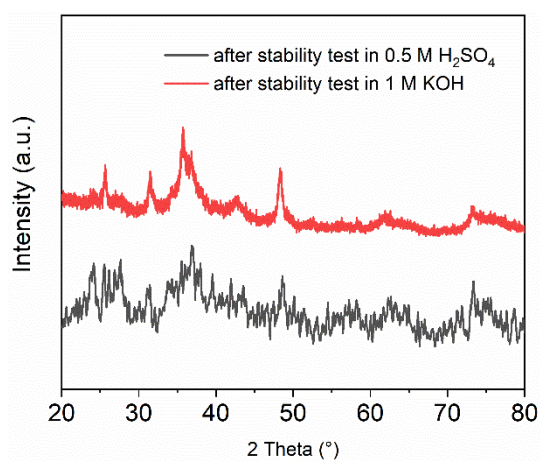

**Fig. S2** XRD patterns of the  $V_C$ -Zn-WC catalyst after a stability test conducted at  $-0.187$  V (vs. RHE) in 1 M KOH and  $-0.229$  V (vs. RHE) in 0.5 M  $H_2SO_4$ .

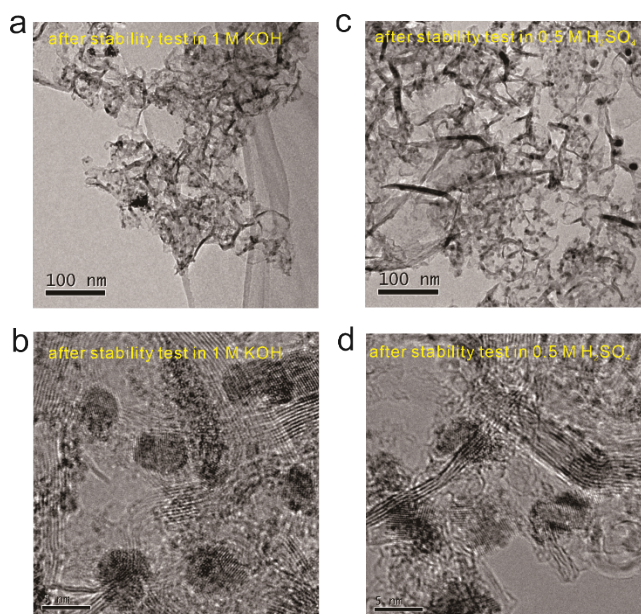

**Fig. S3** HRTEM images of the  $V_C$ -Zn-WC catalyst after a long-term durability test conducted at  $-0.187$  V (vs. RHE) in 1 M KOH and  $-0.229$  V (vs. RHE) in 0.5 M  $H_2SO_4$ .

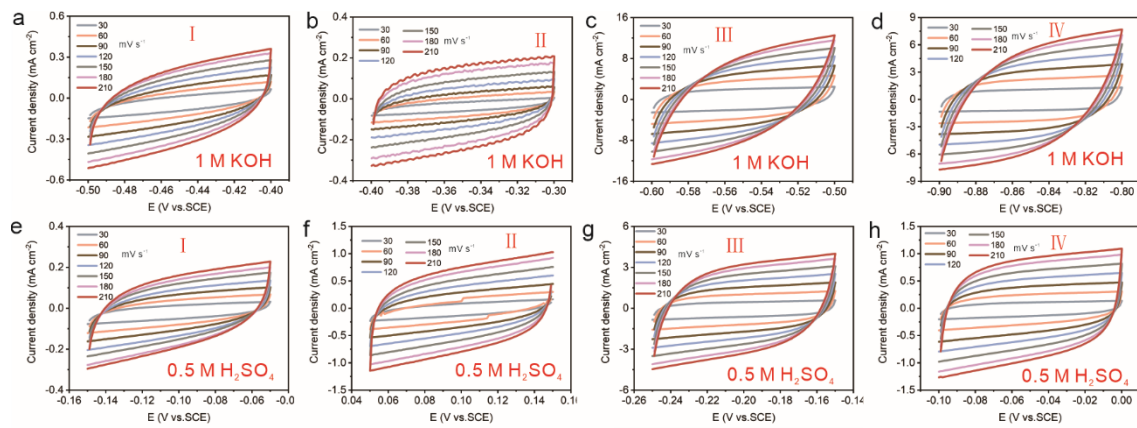

**Fig. S4** CVs of the WC (I), Zn-WC-0.05 (II),  $V_C$ -Zn-WC (III), and Zn-WC-0.2 (IV) catalysts in a-d) 1 M KOH and e-h) 0.5 M  $H_2SO_4$  at different scan rates.

## Supporting Tables

**Table S1.** Performance comparison of the reported WC-based HER catalysts at current density of  $-10 \text{ mA cm}^{-2}$ .

| Catalyst                                         | Electrolyte                          | Overpotential (mV) | Ref.      |
|--------------------------------------------------|--------------------------------------|--------------------|-----------|
| WC/MWCNT                                         | 0.5 M H <sub>2</sub> SO <sub>4</sub> | 250                | [S1]      |
| W <sub>2</sub> C@WC <sub>1-x</sub> @C_8          | 0.5 M H <sub>2</sub> SO <sub>4</sub> | 240                | [S2]      |
| W <sub>2</sub> C/WC nanoparticles                | 0.5 M H <sub>2</sub> SO <sub>4</sub> | 310                | [S3]      |
| 2D i-WC-G                                        | 1 M KOH                              | 225                | [S4]      |
| Porous WC film                                   | 0.5 M H <sub>2</sub> SO <sub>4</sub> | 260                | [S5]      |
| $\alpha$ -WC/CB                                  | 0.5 M H <sub>2</sub> SO <sub>4</sub> | 256                | [S6]      |
| porous WC film                                   | 0.5 M H <sub>2</sub> SO <sub>4</sub> | 275                | [S7]      |
| $\beta$ -Ta <sub>0.3</sub> W <sub>0.7</sub> C/CB | 0.5 M H <sub>2</sub> SO <sub>4</sub> | 242                | [S8]      |
| WC <sub>x</sub> /C                               | 0.5 M H <sub>2</sub> SO <sub>4</sub> | 264                | [S9]      |
| WC-1273K                                         | 0.5 M H <sub>2</sub> SO <sub>4</sub> | 250                | [S10]     |
| WC@NC                                            | 0.5 M H <sub>2</sub> SO <sub>4</sub> | 290                | [S11]     |
| WC nanocrystal                                   | 0.5 M H <sub>2</sub> SO <sub>4</sub> | 248                | [S12]     |
| WC-graphene                                      | 1 M KOH                              | 225                | [S13]     |
| WC@GCFs (~100 nm)                                | 1 M KOH                              | 310                | [S14]     |
| Fe-WCN nanoparticle                              | 1 M KOH                              | 250                | [S15]     |
| V <sub>C</sub> -Zn-WC                            | 0.5 M H <sub>2</sub> SO <sub>4</sub> | 229                | This work |
| V <sub>C</sub> -Zn-WC                            | 1 M KOH                              | 187                | This work |

## Supporting References

- [S1] Q. Gong, Y. Wang, Q. Hu, J. Zhou, R. Feng, P. N. Duchesne, P. Zhang, F. Chen, N. Han, Y. Li, C. Jin, Y. Li, S. Lee, *Nat. Commun.* **2016**, 7, 13216.
- [S2] I. Kim, S. Park, D. Kim, *Nanoscale*, **2018**, 10, 21123.
- [S3] S. Emin, C. Altinkaya, A. Semerci, H. Okuyucu, A. Yildiz, P. Stefanov, *Appl. Catal., B: Environ.* **2018**, 236, 147.
- [S4] M. Zenga, Y. Chena, J. Lia, H. Xuea, R. Mendesb, J. Liua, T. Zhanga, M. Rummeli, L. Fu, *Nano Energy*, **2017**, 33, 356-362.
- [S5] Fei, H.; Yang, Y.; Fan, X.; Wang, G.; Ruan, G.; Tour, J. M. Tungsten-Based Porous Thin-Films for Electrocatalytic Hydrogen Generation. *J. Mater. Chem. A*, **2015**, 3, 5798- 5804.
- [S6] Hunt, S. T.; Nimmanwudipong, T.; Román-Leshkov, Y. Engineering Non-sintered, Metal-Terminated Tungsten Carbide Nanoparticles for Catalysis. *Angew. Chem., Int. Ed.* 2014, 53 (20), 5131-5136.
- [S7] H. Fei, Y. Yang, X. Fan, G. Wang, G. Ruan, M. Tour, Tungsten-based porous thin-films for electrocatalytic hydrogen generation, *J. Mater. Chem. A*, **2015**, 3, 5798.
- [S8] T. Hunt, T. Kokumai, D. Zanchet, Y. Leshkov, Alloying Tungsten Carbide Nanoparticles with Tantalum: Impact on Electrochemical Oxidation Resistance and Hydrogen Evolution Activity, *J. Phys. Chem. C*, **2015**, 119, 13691.
- [S9] Z. Chen, L. Duan, T. Sheng, X. Lin, Y. Chen, Y. Chu, S. Sun, W. Lin, Dodecahedral W@WC Composite as Efficient Catalyst for Hydrogen Evolution and Nitrobenzene Reduction Reactions, *ACS Appl. Mater. Interfaces*, **2017**, 9, 20594-20602.
- [S10] C. Tang, D. Wang, Z. Wu, B. Duan, Tungsten carbide hollow microspheres as electrocatalyst and platinum support for hydrogen evolution reaction, *Int. J. Hydrogen Energy*, **2015**, 40, 3229-3237.
- [S11] L. Han, M. Xu, Y. Han, Y. Yu, S. Dong, Core-shell-structured tungsten carbide encapsulated within nitrogen-doped carbon spheres for enhanced hydrogen evolution, *ChemSusChem*, **2016**, 9, 2784-2787.
- [S12] Y. Ko, J. Choi, I. Kim, D. Jeong, K. Lee, J. Park, Y. Baik, H. Choi, W. Lee, Tungsten carbide nanowalls as electrocatalyst for hydrogen evolution reaction: New approach to durability issue, *Appl. Catal. B. Environ.* **2017**, 203, 684-691.
- [S13] M. Zeng, Y. Chen, J. Li, H. Xue, R. Mendes, J. Liu, T. Zhang, M. Rummeli, L. Fu, 2D WC single crystal embedded in graphene for enhancing hydrogen evolution reaction, *Nano Energy*, **2017**, 33, 356-362.
- [S14] Y. Yin, M. Wen, Z. Tong, Q. Zhan, J. Chen, X. Liu, Y. Li, Z. Wu, D. Dionysiou, In-situ mediation of graphitic carbon film-encapsulated tungsten carbide for enhancing hydrogen evolution performance and stability, *Electrochimica Acta*, 2021, 388, 138566.
- [S15] Y. Zhao, K. Kamiya, K. Hashimoto, S. Nakanishi, Hydrogen evolution by tungsten carbonitride nano electrocatalysts synthesized by the formation of a tungsten acid/polymer hybrid in situ, *Angew. Chem. Int. Ed.* 2013, 52,13638-13641.
